# Supplementary material for: Meta-analysis of Cerebrospinal Fluid Neuron-specific Enolase Levels in Alzheimer’s Disease, Parkinson’s Disease, Dementia With Lewy Bodies, and Multiple System Atrophy
Source: Research Square preprint supplement (doi:10.21203/rs.3.rs-118290/v1), 2020-12-04
Supplement: Supplementary file 1 [file 6b00342817ae3202ae0610b7.xlsx]

## Sheet: Sheet1
Author	Study label	Year	Contrast	D-N	D-M	D-F	D-age-m	D-age-SD	D-NSE-mean	D-NSE-SD	NC-N	NC-M	NC-F	NC-age-m	NC-age-SD	NC-NSE-mean	NC-NSE-SD	Comment 1	Comment 2
Papuc	Papuc, 2020	2020	PD vs. C	58	30	28	65.18	8.54	55.4	7.17	28	13	15	58.14	13.71	45.88	10.91	Original data
Katayama	Katayama, 2020	2020	PD vs. C	21	7	14	72.2381	6.90583	14.1762	4.79379	17	13	4	69.3	15.5	11.4488	5.45113	Original data
Katayama	Katayama, 2020	2020	PDD/DLB vs. C	6	1	5	78.1667	7.88458	18.6517	5.39025	17	13	4	69.3	15.5	11.4488	5.45113	Original data
Santaella	Santaella, 2020	2020	PD vs. C	55	38	17	57.1	10	11.6	4.2	118	66	52	55.9	8.8	9.4	4.8	Original data
Gmitterova	Gmitterova, 2020	2020	PD vs. C	22	10	12	66.6667	25.3596	9.875	3.79653	32	20	12	66.6667	26.3852	11	5.32242	Estimated mean and SD values
Gmitterova	Gmitterova, 2020 (combined)	2020	PDD/DLB vs. C	82	46	36	68.5122	26.3994	12.2951	5.9817	32	20	12	66.6667	26.3852	11	5.32242	Estimated mean and SD values
Palumbo	Palumbo, 2008	2008	PDD/DLB vs. C	20	10	10			11.3	8.8	30					8.3	3.5	Original data	McKeith criteria (2006)
Schaf	Schaf, 2005	2005	PD vs. C	40	27	13	63.8	10.7	6.4	1.5	40	27	13	62.9	10.5	6.6	1.8	Original data	MMSE<24 excluded
Abdo-c	Abdo-c, 2004	2004	PD vs. C	35	21	14	53.6667	10.8217	5.86667	1.70055	48					8.83333	4.89113	Estimated mean and SD values	Hugh's PD criteria (1992)
Mokuno	Mokuno, 1983	1983	PD vs. C	18					7	3.6	18					4.5	1.2	Original data
C: controls
D: disease group
DLB: dementia with Lewy bodies
F: female
M: male
MMSE: mini-mental state examination
N: number of subjects
NSE: neuron-specific enolase
PD: Parkinson's disease
PDD: Parkinson's disease with dementia
SD: standard deviation
