# Supplementary material for: Meta-analysis of Cerebrospinal Fluid Neuron-specific Enolase Levels in Alzheimer’s Disease, Parkinson’s Disease, Dementia With Lewy Bodies, and Multiple System Atrophy
Source: Research Square preprint supplement (doi:10.21203/rs.3.rs-118290/v1), 2020-12-04
Supplement: Supplementary file 2 [file 749659be66111e6891a4deb2.xlsx]

## Sheet: Sheet1
Author	Study label	Year	Contrast	D-N	D-M	D-F	D-age-m	D-age-SD	D-NSE-mean	D-NSE-SD	NC-N	NC-M	NC-F	NC-age-m	NC-age-SD	NC-NSE-mean	NC-NSE-SD	Comment 1
Katayama	Katayama, 2020	2020	AD vs. C	5	2	3	69	14.6116	16.192	4.18776	17	13	4	69.3	15.5	11.4488	5.45113	Original data
Christl	Christl, 2019	2019	AD vs. C	26	11	15	70.6	7.8	23.2	7.8	23	13	10	67.8	6.8	19.6	6.2	Estimated mean and SD values
Llorens	Llorens, 2017	2017	AD vs. C	65	22	43	67	11	15	11	50	23	27	70	6	16	5	Original data
Ohrfelt	Ohrfelt, 2016	2016	AD vs. C	10	3	7	79	10.32	45.3333	15.4801	31	16	15	73.6667	6.99469	22.6667	10.1034	Estimated mean and SD values
Schmidt	Schmidt, 2014	2014	AD vs. C	32	11	21	74.37	6.64	20.45	7.21	32	18	14	50.75	16.5	6.43	4.1	Original data
Caplan	Caplan, 2010	2010	AD vs. C	20			81.1	6.1	8.98	2.98	20			81.6	7.7	4.84	2.02	Original data
Palumbo	Palumbo, 2008	2008	AD vs. C	76	37	39			15.1	9.9	30					8.3	3.5	Original data
Nooijen	Nooijen, 1997	1997	AD vs. C	28					8.8	2.3	20					8.8	2.6	Original data
Pametti, 1995 (combined)	Pametti, 1995 (combined)	1995	AD vs. C	30					7.94	3.3394	11					7.8	2.4	Combined (e-AD and l-AD)
Blennow	Blennow, 1994	1994	AD vs. C	45	21	24	72.1	7.5	4.7	2.7	33	19	14	64.9	6.4	2.2	1	Original data
Sulkava	Sulkava, 1988	1988	AD vs. C	22	10	12	69	1	9.1	2.2	15	7	8	67.7	1.7	8.6	2.59	SD values calculated from SE values
Cutler	Cutler, 1986	1986	AD vs. C	30	18	12	66.9	9	12.4	3.61	13	11	2	66.8	9	15	4.4	SD values calculated from SE values
Royds	Royds, 1983	1983	AD vs. C	7					9.7	3.1749	23					3	2.4	SD values calculated from SE values
AD: Alzheimer's disease
D: disease group
e-AD: early Alzheimer's disease
F: female
l-AD: late Alzheimer's disease
M: male
N: number of subjects
NC: normal controls
NSE: neuron-specific enolase
SD: standard deviation
SE: standard error
