# Supplementary material for: Meta-analysis of Cerebrospinal Fluid Neuron-specific Enolase Levels in Alzheimer’s Disease, Parkinson’s Disease, Dementia With Lewy Bodies, and Multiple System Atrophy
Source: Research Square preprint supplement (doi:10.21203/rs.3.rs-118290/v1), 2020-12-04
Supplement: Supplementary file 3 [file 76aeeb4e258a23165ac27086.xlsx]

## Sheet: Sheet1
Author	Study label	Year	Contrast	D-N	D-M	D-F	D-age-m	D-age-SD	D-NSE-mean	D-NSE-SD	NC-N	NC-M	NC-F	NC-age-m	NC-age-SD	NC-NSE-mean	NC-NSE-SD	Comment
Katayama	Katayama, 2020	2020	MSA-C vs. C	9	5	4	73	8	22.6629	6.56425	17	13	4	69.3	15.5	11.4488	5.45113	Original data
Katayama	Katayama, 2020	2020	MSA-P vs. C	3	0	3	75	3.4641	16.8167	3.28293	17	13	4	69.3	15.5	11.4488	5.45113	Original data
Santaella	Santaella, 2020	2020		22	15	7	60.7	7.1	12.4	4.1	118	66	52	55.9	8.8	9.4	4.8	Original data
Abdo-a	Abdo-a, 2007	2007	MSA-C vs. C	26			60.9	7.8	8.9	3.5	32					9.6	5	Original data
Abdo-b	Abdo-b, 2007	2007	MSA-P vs. C	19			59.6	6.6	8	3.1	32					9.6	5	Original data
Abdo-a	Abdo-a, 2004	2004	MSA-C vs. C	14	12	2	60	9.06115	7.66667	3.21259	48					8.83333	4.89113	Estimated mean and SD values
Abdo-b	Abdo-b, 2004	2004	MSA-P vs. C	15	10	5	62	5.72526	8.6	3.18979	48					8.83333	4.89113	Estimated mean and SD values
C: controls
D: disease group
F: female
M: male
MSA-C: multiple system atrophy with cerebellar features
MSA-P: multiple system atrophy with predominant Parkinsonism
N: number of subjects
NSE: neuron-specific enolase
SD: standard deviation
